# Supplementary material
Source: PubMed Central journal article supplement (PMC3133970)
Supplement: NIHMS301793-supplement-Supplementary_Table_1.pdf [file NIHMS301793-supplement-Supplementary_Table_1.pdf]

**Table 1** Sequencing primers for MEN1 coding exons

| <b>Exon</b>      | <b>Forward Primer</b>                    | <b>Reverse Primer</b>                    |
|------------------|------------------------------------------|------------------------------------------|
| <b>2 #1</b>      | TGTA AACGACGGCCAGTTGGAACCTTAGCGGACCCTG   | CAGGAAACAGCTATGACCAGACACCCCTTCTCGAGGA    |
| <b>2 #2</b>      | TGTA AACGACGGCCAGTGACCTGTCTATCATCGCCGC   | CAGGAAACAGCTATGACCACACCTGCCGAACCTCACA    |
| <b>2 #3</b>      | TGTA AACGACGGCCAGTTTCCCAGCTCACCTTCCAG    | CAGGAAACAGCTATGACCACACCTGCCGAACCTCACA    |
| <b>3</b>         | TGTA AACGACGGCCAGTCCCTTTCCCATGTTAAAGCA   | CAGGAAACAGCTATGACCCCAAGAAAATGGAGTCCCTT   |
| <b>4</b>         | TGTA AACGACGGCCAGTATTCCTGAAGCAGGCACAG    | CAGGAAACAGCTATGACCCGGTCCCACAGCAAGTCAAGTC |
| <b>5 &amp; 6</b> | TGTA AACGACGGCCAGTTTGGTTCTGACCCCACT      | CAGGAAACAGCTATGACCCGATACCCCAACACACA      |
| <b>7</b>         | TGTA AACGACGGCCAGTTCTTCCTGTGGCCCTTCTG    | CAGGAAACAGCTATGACCATGGTGGCCTTGCTGCCTAG   |
| <b>8</b>         | TGTA AACGACGGCCAGTATGGTGAGACCCCTTCAGACC  | CAGGAAACAGCTATGACCAATCCCGTACATGCAGCCC    |
| <b>9</b>         | TGTA AACGACGGCCAGTCCCAACCTATGCTTACCTTTTC | CAGGAAACAGCTATGACCAAGTCTGACAAGCCCGTGG    |
| <b>10 #1</b>     | TGTA AACGACGGCCAGTCAGCATCTGCCATCCCTT     | CAGGAAACAGCTATGACCAGCGACAGTCCCAGGAGGCTT  |
| <b>10 #2</b>     | TGTA AACGACGGCCAGTGAGTCCAAGCCAGAGGAG     | CAGGAAACAGCTATGACCCGGTAGAGGTGAGGCCTGT    |
| <b>10 #3</b>     | TGTA AACGACGGCCAGTGCATAGTGAGCCGAGAGG     | CAGGAAACAGCTATGACCTCGAGTTGATCTTGGTGG     |
